# Supplementary material for: Synthesis of 18O-labeled RNA for application to kinetic studies and imaging
Source: PubMed Central journal article supplement (PMC3695515; doi:10.1093/nar/gkt344), 2013-04-30
Supplement: supp_gkt344_nar-03422-met-g-2012-File009.pdf [file supp_gkt344_nar-03422-met-g-2012-File009.pdf]

## Supplementary Data

### Synthesis of $^{18}\text{O}$ -labeled RNA for application to kinetic studies and imaging

Tomohiro Hamasaki<sup>1</sup>, Takahiro Matsumoto<sup>1,2</sup>, Naoya Sakamoto<sup>3</sup>, Akiko Shimahara<sup>1</sup>, Shiori Kato<sup>1</sup>, Ayumi Yoshitake<sup>1</sup>, Ayumi Utsunomiya<sup>1</sup>, Hisayoshi Yurimoto<sup>3</sup>, Esteban C Gabazza<sup>1,2</sup>, and Tadaaki Ohgi<sup>1,\*</sup>.

<sup>1</sup>BONAC Corporation, BIO Factory 4F, 4-1488 Aikawa, Kurume, Fukuoka 839-0861, Japan;

<sup>2</sup>Department of Immunology, Mie University Graduate School of Medicine, 2-174 Edobashi, Tsu, Mie 514-8507, Japan; <sup>3</sup>Department of Natural History of Science, Hokkaido University Graduate

School of Science, Kita-ku, Sapporo 060-0810, Japan

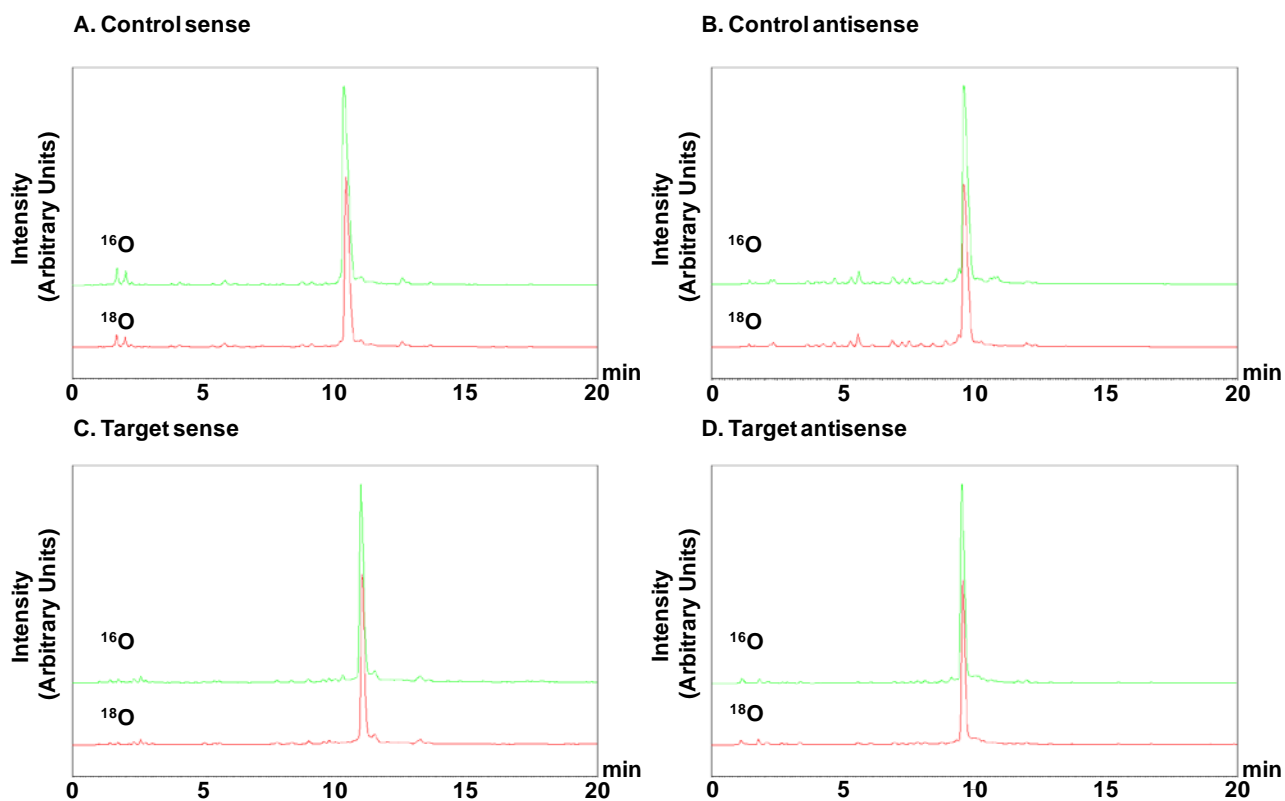

**Supplementary Figure S1.** HPLC chromatograms of control and target siRNA. Green chromatograms,  $^{16}\text{O}$ -RNA; red chromatograms,  $^{18}\text{O}$ -labeled RNA.

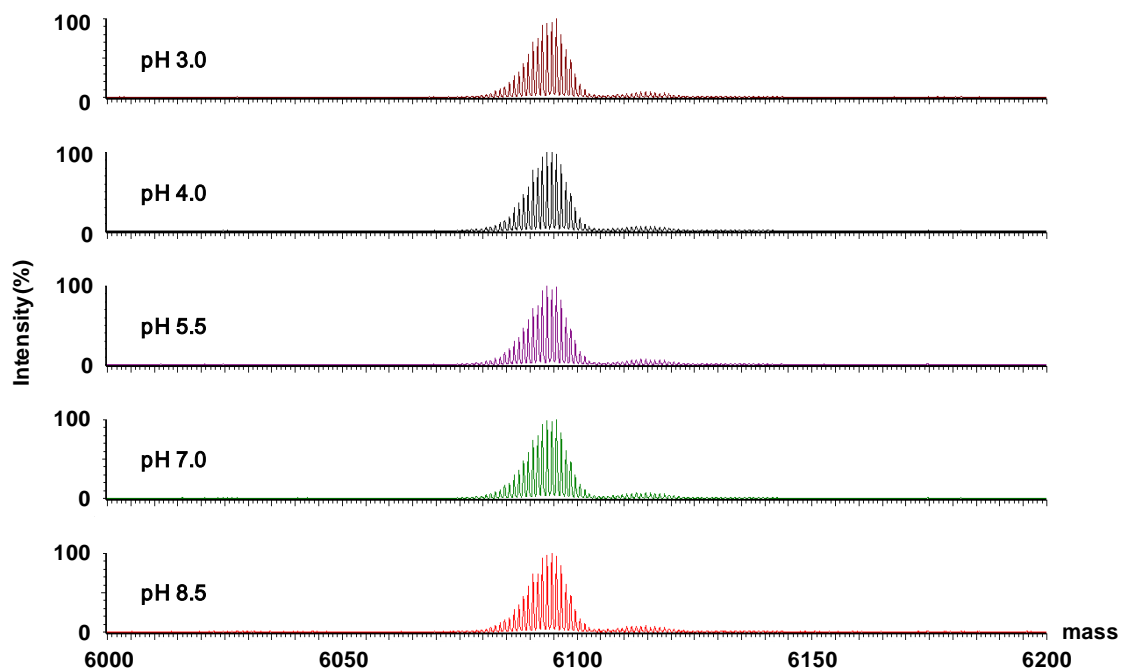

**Supplementary Figure S2.** LC-ESI-Q-ToF mass spectra of  $^{18}\text{O}$ -labeled uridine 20mer RNA after incubation at  $37^\circ\text{C}$  for 28 days at various pH values.

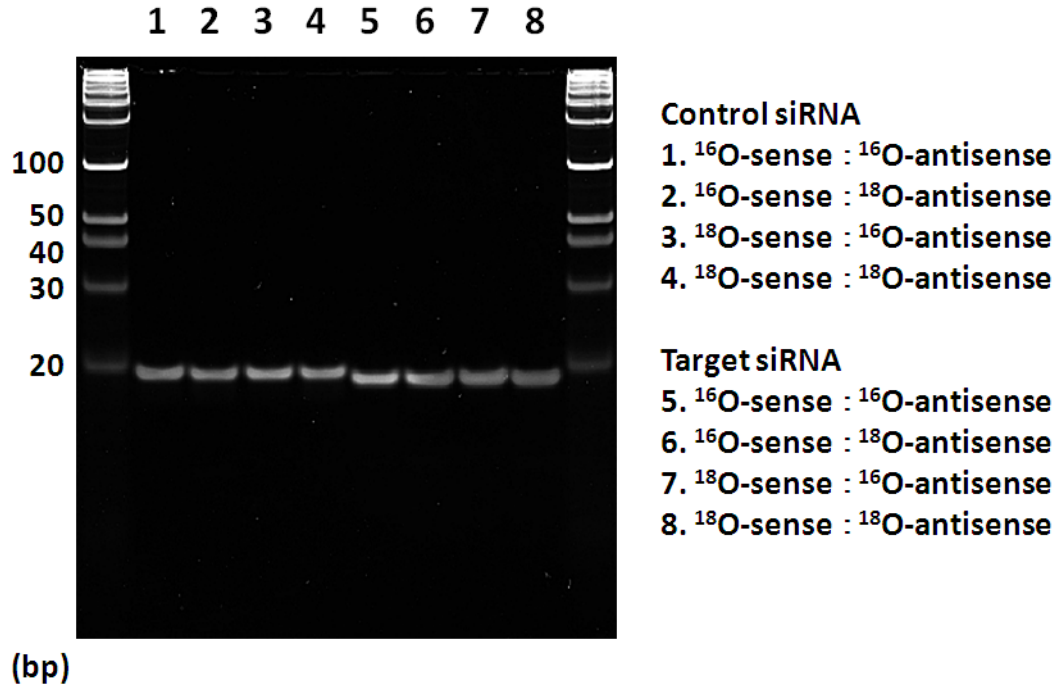

**Supplementary Figure S3.** Polyacrylamide gel electrophoresis of control and target siRNA. RNA was analyzed on a 15% gel stained with ethidium bromide. siRNA Ladder Marker (Takara Bio) was used as a size marker for double-stranded RNA.

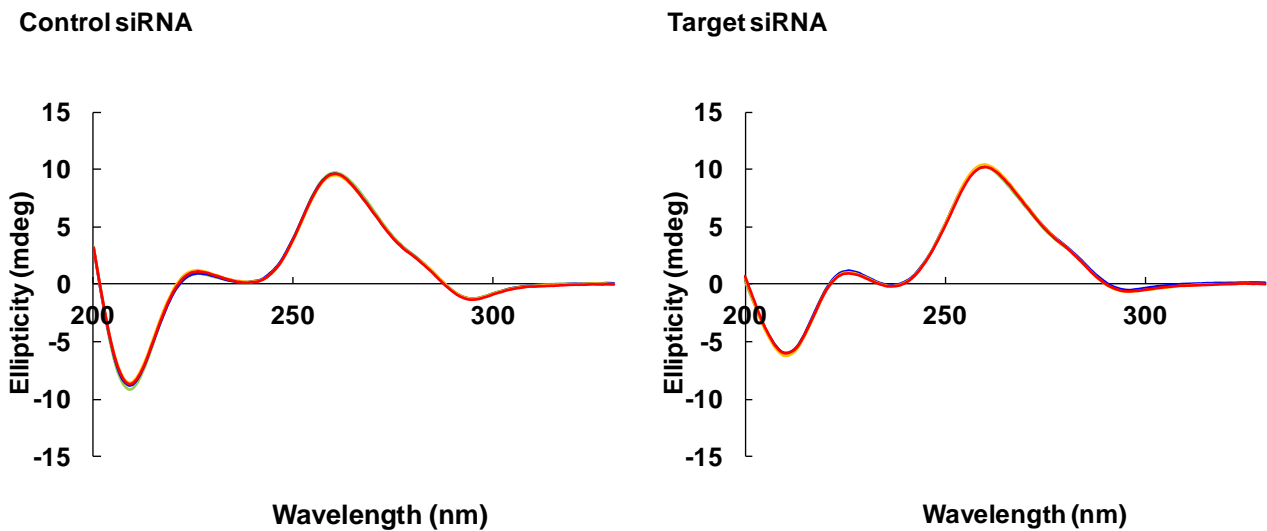

**Supplementary Figure S4.** CD spectra of 10  $\mu\text{M}$  control (left panel) and target (right panel) siRNA in 50 mM phosphate buffer, pH 7.5, at 25  $^{\circ}\text{C}$ . The sense/antisense strand combinations are shown as follows: green spectra,  $^{16}\text{O}/^{16}\text{O}$ -siRNA; blue spectra,  $^{16}\text{O}/^{18}\text{O}$ -siRNA; yellow spectra,  $^{18}\text{O}/^{16}\text{O}$ -siRNA; red spectra,  $^{18}\text{O}/^{18}\text{O}$ -siRNA.

**Supplementary Table S1.**  $T_m$  values (°C) of control and target siRNA.

|                                                                                | <b>control siRNA</b> | <b>Target siRNA</b> |
|--------------------------------------------------------------------------------|----------------------|---------------------|
| <b><math>^{16}\text{O}</math>-sense : <math>^{16}\text{O}</math>-antisense</b> | <b>67.69</b>         | <b>67.16</b>        |
| <b><math>^{16}\text{O}</math>-sense : <math>^{18}\text{O}</math>-antisense</b> | <b>67.52</b>         | <b>67.25</b>        |
| <b><math>^{18}\text{O}</math>-sense : <math>^{16}\text{O}</math>-antisense</b> | <b>67.20</b>         | <b>66.66</b>        |
| <b><math>^{18}\text{O}</math>-sense : <math>^{18}\text{O}</math>-antisense</b> | <b>67.10</b>         | <b>66.66</b>        |
